# Supplementary material for: National Comprehensive Cancer Network Guideline Recommendations of Cancer Drugs With Accelerated Approval
Source: PubMed Central journal article supplement (PMC10646727; doi:10.1001/jamanetworkopen.2023.43285), 2023-11-14
Supplement: jamanetwopen-e2343285-s001.pdf [file jamanetwopen-e2343285-s001.pdf]

## Data Sharing Statement

Cliff. National Comprehensive Cancer Network Guideline Recommendations of Cancer Drugs With Accelerated Approval. *JAMA Netw Open*. Published November 14, 2023.

doi:10.1001/jamanetworkopen.2023.43285

### Data

**Data available:** Yes

**Data types:** Data (not involving human participants)

**How to access data:** <https://www.nccn.org/>

<https://www.accessdata.fda.gov/scripts/cder/daf/index.cfm>

**When available:** With publication

### Supporting Documents

**Document types:** None

### Additional Information

**Who can access the data:** anyone making reasonable request of data

**Types of analyses:** for any reasonable purpose

**Mechanisms of data availability:** with investigator support
